# Supplementary material for: Transport Property of Wrinkled Graphene Nanoribbon Tuned by Spin-Polarized Gate Made of Vanadium-Benzene Nanowire
Source: MDPI journal article supplement (doi:10.3390/nano13152270), 2023-08-07
Supplement: s1 [file s1]

**Supporting Information for**  
**Transport Property of Wrinkle Graphene Nanoribbon Tuned by**  
**Spin-Polarized Gate Made of V<sub>7</sub>(Bz)<sub>8</sub> Nanowire**

Hong Yu, Yan Shang\*, Lei Pei, Yangyang Hu, Guiling Zhang\*

*School of Materials Science and Chemical Engineering, Harbin University of Science and Technology, Harbin 150080, China.*

*\*Corresponding author (email: [guiling-002@163.com](mailto:guiling-002@163.com); shangyan1972@126.com)*

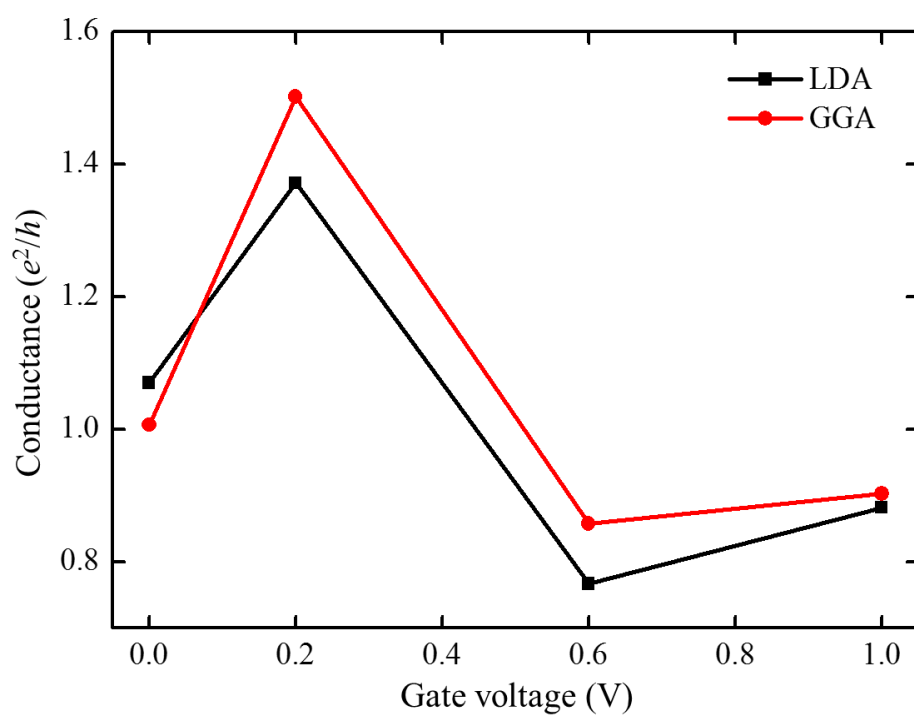

Figure S1 Comparison of LDA and GGA calculated conductance of S-D channel at  $V_S = 0.0$  V for the 0flat device.

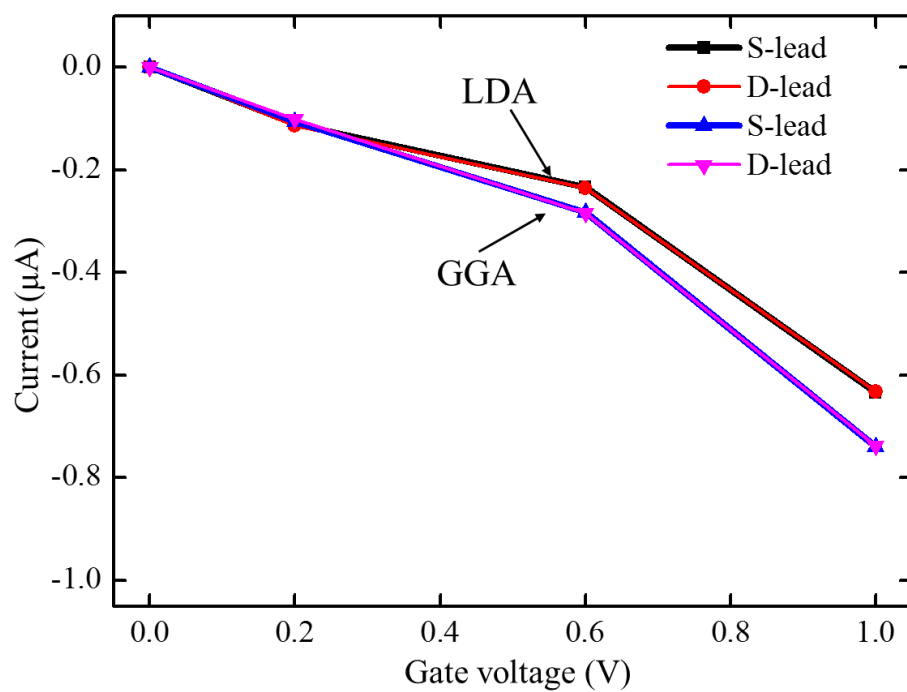

Figure S2 Comparison of LDA and GGA calculated currents of S-lead and D-lead at  $V_S = 0.0$  V in the 0flat device.

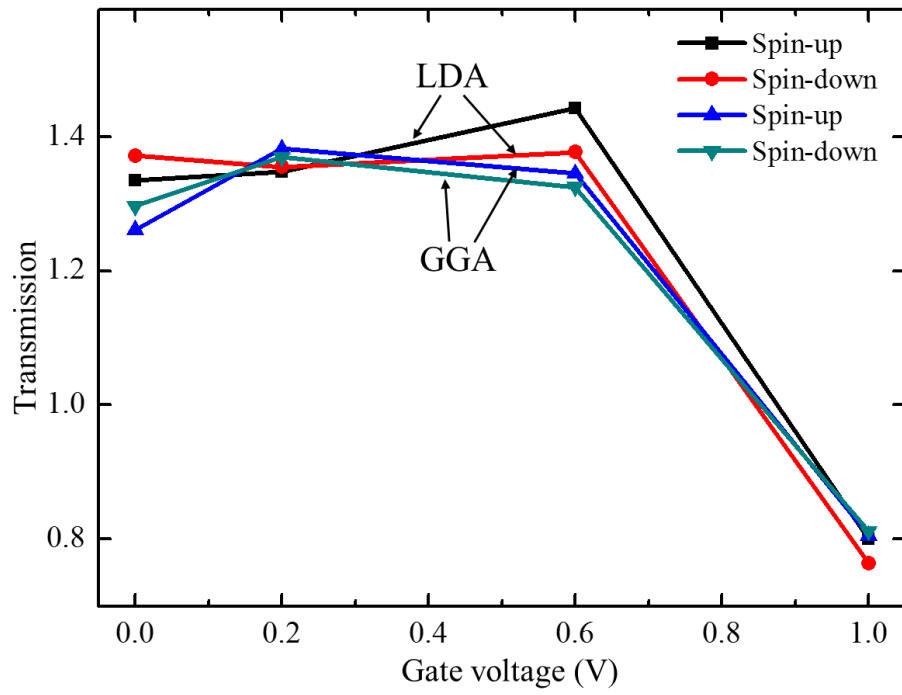

Figure S3 Comparison of LDA and GGA calculated transmission coefficient of S-D channel at  $V_S = 0.0$  V in the 0flat device.
